# Supplementary material for: Premature mortality attributable to socioeconomic inequality in England between 2003 and 2018: an observational study
Source: PubMed Central journal article supplement (PMC7098478; doi:10.1016/s2468-2667(19)30219-1), 2019-12-05
Supplement: mmc1.pdf [file mmc1.pdf]

# THE LANCET

## Public Health

### Supplementary appendix

This appendix formed part of the original submission and has been peer reviewed. We post it as supplied by the authors.

Supplement to: Lewer D, Jayatunga W, Aldridge RW, et al. Premature mortality attributable to socioeconomic inequality in England between 2003 and 2018: an observational study. *Lancet Public Health* 2019; published online Dec 5. [https://doi.org/10.1016/S2468-2667\(19\)30219-1](https://doi.org/10.1016/S2468-2667(19)30219-1).

## **Supplementary Information**

1. Population pyramids by deprivation decile
2. Detailed cause-specific inequality
3. Mortality attributable to socioeconomic inequality, by major cause of death and sex
4. Map of mortality attributable to socioeconomic inequality, by local authority
5. Mortality attributable to socioeconomic inequality, using different quantiles of deprivation
6. Change in premature mortality rates between 2003-2006 and 2015-2018, by cause, sex and deprivation
7. Survival curves by sex and deprivation, estimated by life table modelling
8. References for supplementary information

# 1 Population pyramids by deprivation decile

Figure S1: Population pyramids by index of multiple deprivation 2015, aggregated for England, 2003-2018

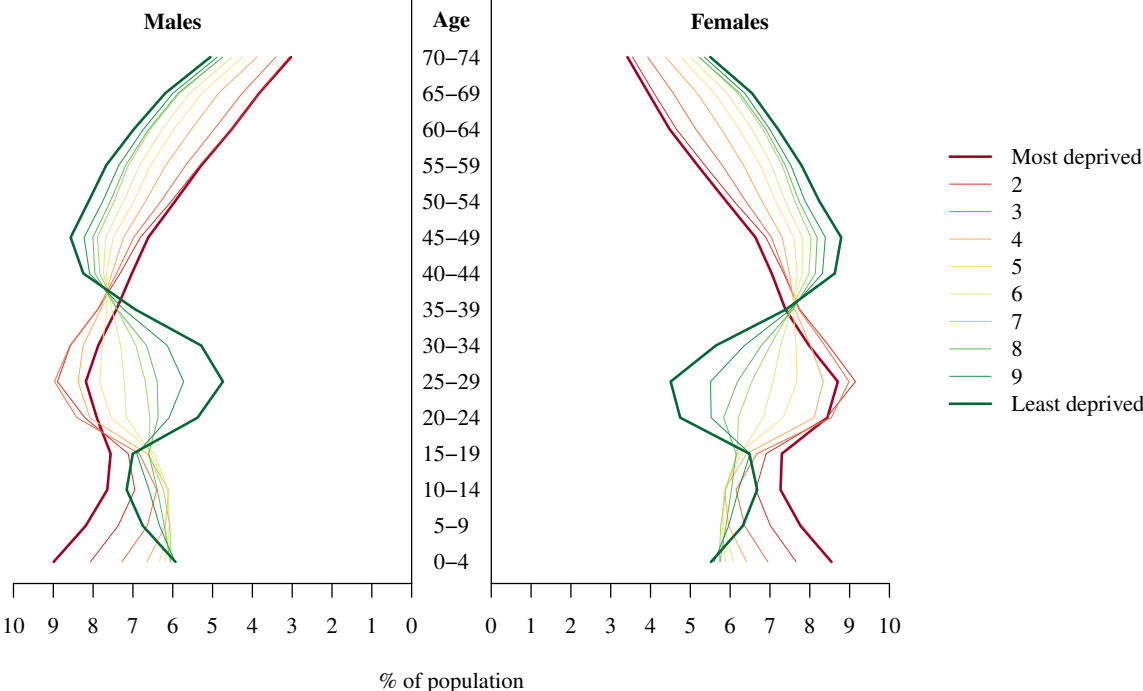

Populations are taken from publicly available mid-year population estimates produced by the Office for National Statistics [1]

## 2 Detailed cause-specific inequality (table S1)

| Chapter      | Subgroup                    | Diagnosis              | ICD10 codes                    | Deaths  | Expected deaths | Excess deaths | % of excess deaths | MASI (95% CI)        | YLLs                 | Expected YLLs | Excess YLLs | % of excess YLLs | YLLI (%) |
|--------------|-----------------------------|------------------------|--------------------------------|---------|-----------------|---------------|--------------------|----------------------|----------------------|---------------|-------------|------------------|----------|
| I Infections | Tuberculosis                |                        | A15-19                         | 2,111   | 412             | 1,699         | 0.19%              | 80.5% (74.7 to 86.0) | 6,966                | 1,008         | 5,959       | 0.25%            | 85.5%    |
|              | HIV                         |                        | B20-24                         | 2,907   | 707             | 2,200         | 0.25%              | 75.7% (69.8 to 81.2) | 13,885               | 3,056         | 10,830      | 0.45%            | 78.0%    |
|              | Viral hepatitis             |                        | B15-19                         | 2,717   | 854             | 1,863         | 0.21%              | 68.6% (62.2 to 74.8) | 9,726                | 2,862         | 6,865       | 0.29%            | 70.6%    |
|              | Intestinal                  |                        | A01-09                         | 4,037   | 2,140           | 1,897         | 0.22%              | 47.0% (40.4 to 53.5) | 8,289                | 4,326         | 3,963       | 0.17%            | 47.8%    |
|              | Other                       |                        | A22-79; A96-98; B00-08; B25-99 | 14,793  | 8,512           | 6,282         | 0.72%              | 42.5% (38.8 to 46.0) | 56,084               | 32,069        | 24,015      | 1.00%            | 42.8%    |
|              | Viral infections of the CNS |                        | A81-89                         | 1,551   | 1,450           | 101           | 0.01%              | 6.5% (-7.7 to 20.3)  | 4,732                | 4,433         | 299         | 0.01%            | 6.3%     |
|              | TOTAL                       |                        | B00-99; A01-98                 | 28,116  | 14,075          | 14,041        | 1.60%              | 49.9% (47.5 to 52.4) | 99,683               | 47,753        | 51,930      | 2.16%            | 52.1%    |
| II Cancers   | Respiratory                 | Larynx                 | C32                            | 5,957   | 2,347           | 3,610         | 0.41%              | 60.6% (56.0 to 65.2) | 12,912               | 4,929         | 7,984       | 0.33%            | 61.8%    |
|              |                             | Lung                   | C34                            | 228,586 | 121,416         | 107,170       | 12.22%             | 46.9% (46.0 to 47.7) | 437,024              | 226,221       | 210,803     | 8.78%            | 48.2%    |
|              |                             | Other                  | C30-31; C33; C35-39            | 2,425   | 2,121           | 304           | 0.03%              | 12.5% (1.8 to 22.9)  | 6,688                | 5,959         | 728         | 0.03%            | 10.9%    |
|              |                             | Total                  | C30-39                         | 236,968 | 125,885         | 111,083       | 12.67%             | 46.9% (46.0 to 47.7) | 456,624              | 237,109       | 219,515     | 9.14%            | 48.1%    |
|              | Mouth                       |                        | C00-14                         | 20,322  | 10,987          | 9,335         | 1.06%              | 45.9% (43.0 to 48.8) | 52,289               | 27,763        | 24,527      | 1.02%            | 46.9%    |
|              | Other                       |                        | C76-80; C97; D00-48            | 80,830  | 57,854          | 22,976        | 2.62%              | 28.4% (26.8 to 30.1) | 175,316              | 129,855       | 45,461      | 1.89%            | 25.9%    |
|              | Urinary                     | Bladder                | C67                            | 20,910  | 15,085          | 5,825         | 0.66%              | 27.9% (24.6 to 31.2) | 35,838               | 25,719        | 10,119      | 0.42%            | 28.2%    |
|              |                             | Other                  | C65-66; C68                    | 1,753   | 1,374           | 379           | 0.04%              | 21.6% (10.0 to 33.2) | 3,070                | 2,318         | 752         | 0.03%            | 24.5%    |
|              |                             | Kidney                 | C64                            | 25,151  | 21,026          | 4,125         | 0.47%              | 16.4% (13.1 to 19.6) | 56,494               | 47,697        | 8,797       | 0.37%            | 15.6%    |
|              |                             | Total                  | C64-68                         | 47,814  | 37,485          | 10,329        | 1.18%              | 21.6% (19.3 to 23.8) | 95,402               | 75,734        | 19,668      | 0.82%            | 20.6%    |
|              | Digestive                   | Anus and anal canal    | C21                            | 2,281   | 1,398           | 883           | 0.10%              | 38.7% (29.3 to 47.8) | 5,907                | 3,615         | 2,292       | 0.10%            | 38.8%    |
|              |                             | Stomach                | C16                            | 26,583  | 17,911          | 8,672         | 0.99%              | 32.6% (29.7 to 35.4) | 55,608               | 38,887        | 16,720      | 0.70%            | 30.1%    |
|              |                             | Gallbladder            | C23                            | 2,830   | 1,981           | 849           | 0.10%              | 30.0% (21.2 to 38.8) | 5,523                | 3,888         | 1,635       | 0.07%            | 29.6%    |
|              |                             | Liver & IH bile ducts  | C22                            | 27,129  | 19,451          | 7,678         | 0.88%              | 28.3% (25.4 to 31.1) | 57,915               | 39,461        | 18,454      | 0.77%            | 31.9%    |
|              |                             | Oesophagus             | C15                            | 51,072  | 37,149          | 13,924        | 1.59%              | 27.3% (25.2 to 29.4) | 105,586              | 77,115        | 28,471      | 1.19%            | 27.0%    |
|              |                             | Rectum                 | C20                            | 23,833  | 19,337          | 4,496         | 0.51%              | 18.9% (15.6 to 22.1) | 50,310               | 42,573        | 7,737       | 0.32%            | 15.4%    |
|              |                             | Other                  | C26                            | 14,741  | 12,551          | 2,190         | 0.25%              | 14.9% (10.6 to 19.1) | 30,360               | 26,798        | 3,562       | 0.15%            | 11.7%    |
|              |                             | Pancreas               | C25                            | 54,664  | 47,392          | 7,272         | 0.83%              | 13.3% (11.1 to 15.5) | 107,582              | 93,865        | 13,718      | 0.57%            | 12.8%    |
|              |                             | Rectosigmoid junction  | C19                            | 13,362  | 11,778          | 1,584         | 0.18%              | 11.9% (7.2 to 16.4)  | 29,257               | 27,514        | 1,743       | 0.07%            | 6.0%     |
|              |                             | Biliary tract          | C24                            | 1,348   | 1,210           | 138           | 0.02%              | 10.2% (-3.9 to 24.3) | 2,584                | 2,028         | 557         | 0.02%            | 21.5%    |
|              |                             | Small intestine        | C17                            | 2,780   | 2,523           | 257           | 0.03%              | 9.3% (-0.9 to 19.3)  | 6,093                | 5,445         | 648         | 0.03%            | 10.6%    |
|              |                             | Colon                  | C18                            | 51,358  | 46,837          | 4,521         | 0.52%              | 8.8% (6.5 to 11.1)   | 104,154              | 99,326        | 4,829       | 0.20%            | 4.6%     |
|              |                             | Total                  | C15-26                         | 271,981 | 219,519         | 52,462        | 5.98%              | 19.3% (18.3 to 20.3) | 560,880              | 460,514       | 100,365     | 4.18%            | 17.9%    |
|              |                             | Female genital organs  |                                | C51-58  | 55,661          | 46,166        | 9,495              | 1.08%                | 17.1% (14.9 to 19.2) | 133,014       | 108,386     | 24,628           | 1.03%    |
|              | Thyroid & endocrine glands  |                        | C73-75                         | 3,906   | 3,438           | 468           | 0.05%              | 12.0% (3.4 to 20.5)  | 14,862               | 13,128        | 1,734       | 0.07%            | 11.7%    |
|              | Male genital organs         |                        | C60-63                         | 39,842  | 36,270          | 3,572         | 0.41%              | 9.0% (6.3 to 11.5)   | 58,340               | 54,937        | 3,403       | 0.14%            | 5.8%     |
|              | Lymphoid & haematopoietic   | Leukaemia, unspecified | C95                            | 1,089   | 901             | 188           | 0.02%              | 17.3% (1.0 to 32.9)  | 3,128                | 3,059         | 69          | 0.00%            | 2.2%     |
|              |                             | Hodgkin lymphoma       | C81                            | 2,543   | 2,109           | 434           | 0.05%              | 17.1% (5.9 to 27.9)  | 9,360                | 8,853         | 506         | 0.02%            | 5.4%     |
|              |                             | Follicular lymphoma    | C82                            | 1,298   | 1,155           | 143           | 0.02%              | 11.0% (-3.3 to 25.1) | 2,770                | 2,534         | 236         | 0.01%            | 8.5%     |

| Chapter                     | Subgroup                              | Diagnosis                 | ICD10 codes         | Deaths  | Expected deaths | Excess deaths         | % of excess deaths    | MA SI (95% CI)       | YLLs      | Expected YLLs | Excess YLLs | % of excess YLLs | YLLI (%) |
|-----------------------------|---------------------------------------|---------------------------|---------------------|---------|-----------------|-----------------------|-----------------------|----------------------|-----------|---------------|-------------|------------------|----------|
| 4                           |                                       | Other                     | C85-89; C93-94; C96 | 19,650  | 17,581          | 2,069                 | 0.24%                 | 10.5% (6.7 to 14.3)  | 42,563    | 38,342        | 4,221       | 0.18%            | 9.9%     |
|                             |                                       | T/NK-cell lymphomas       | C84                 | 2,341   | 2,114           | 227                   | 0.03%                 | 9.7% (-1.6 to 20.4)  | 6,394     | 5,275         | 1,119       | 0.05%            | 17.5%    |
|                             |                                       | Myeloid leukaemia         | C92                 | 17,733  | 16,316          | 1,418                 | 0.16%                 | 8.0% (3.9 to 12.0)   | 45,224    | 43,166        | 2,057       | 0.09%            | 4.5%     |
|                             |                                       | Lymphoid leukaemia        | C91                 | 7,387   | 7,014           | 373                   | 0.04%                 | 5.0% (-1.4 to 11.4)  | 23,781    | 22,870        | 911         | 0.04%            | 3.8%     |
|                             |                                       | Multiple myeloma          | C90                 | 15,428  | 14,880          | 548                   | 0.06%                 | 3.6% (-0.8 to 7.9)   | 27,827    | 26,529        | 1,298       | 0.05%            | 4.7%     |
|                             |                                       | Non-follicular lymphoma   | C83                 | 5,885   | 5,866           | 19                    | 0.00%                 | 0.3% (-6.8 to 7.3)   | 13,840    | 14,378        | -538        | -0.02%           | -3.9%    |
|                             |                                       | Total                     | C81-96              | 73,354  | 67,936          | 5,418                 | 0.62%                 | 7.4% (5.3 to 9.4)    | 174,888   | 165,009       | 9,879       | 0.41%            | 5.6%     |
|                             | Bone and articular cartilage          | C40-41                    | 2,880               | 2,703   | 177             | 0.02%                 | 6.1% (-5.3 to 16.9)   | 16,126               | 16,886    | -760          | -0.03%      | -4.7%            |          |
|                             | Mesothelial and soft tissue           | C45-49                    | 25,384              | 24,246  | 1,138           | 0.13%                 | 4.5% (1.1 to 7.9)     | 55,476               | 54,844    | 632           | 0.03%       | 1.1%             |          |
|                             | Breast                                | C50                       | 84,301              | 80,613  | 3,688           | 0.42%                 | 4.4% (2.5 to 6.2)     | 230,984              | 226,387   | 4,597         | 0.19%       | 2.0%             |          |
|                             | Eye, brain & CNS                      | C69-72                    | 38,626              | 40,965  | -2,339          | -0.27%                | -6.1% (-9.1 to -3.1)  | 124,255              | 134,618   | -10,364       | -0.43%      | -8.3%            |          |
|                             | Skin                                  | C43-44                    | 19,248              | 20,862  | -1,614          | -0.18%                | -8.4% (-12.6 to -4.1) | 51,695               | 58,265    | -6,570        | -0.27%      | -12.7%           |          |
|                             | TOTAL                                 | C00-97; D00-48            | 1,001,117           | 774,927 | 226,190         | 25.79%                | 22.6% (22.1 to 23.1)  | 2,200,151            | 1,763,434 | 436,717       | 18.19%      | 19.8%            |          |
|                             | III Blood                             | Aplastic & other anaemias | D60-64              | 972     | 576             | 396                   | 0.05%                 | 40.7% (26.2 to 54.4) | 3,077     | 1,838         | 1,239       | 0.05%            | 40.3%    |
|                             | Immune mechanism                      | D80-89                    | 2,032               | 1,251   | 781             | 0.09%                 | 38.4% (28.1 to 48.3)  | 7,025                | 4,640     | 2,386         | 0.10%       | 34.0%            |          |
|                             | Other                                 | D50-59; D65-77            | 3,348               | 2,323   | 1,025           | 0.12%                 | 30.6% (22.2 to 39.2)  | 13,290               | 8,409     | 4,881         | 0.20%       | 36.7%            |          |
|                             | TOTAL                                 | D50-89                    | 6,352               | 4,151   | 2,202           | 0.25%                 | 34.7% (28.8 to 40.6)  | 23,392               | 14,887    | 8,506         | 0.35%       | 36.4%            |          |
|                             | IV Endocrine, nutritional & metabolic | Obesity                   | E66-67              | 4,393   | 1,414           | 2,979                 | 0.34%                 | 67.8% (62.7 to 72.7) | 14,936    | 4,242         | 10,694      | 0.45%            | 71.6%    |
|                             | Diabetes mellitus                     | E10-14                    | 23,787              | 9,848   | 13,939          | 1.59%                 | 58.6% (56.1 to 61.0)  | 57,606               | 22,786    | 34,820        | 1.45%       | 60.4%            |          |
|                             | Other                                 | E00-07; E15-63            | 1,931               | 1,013   | 918             | 0.10%                 | 47.5% (37.8 to 57.1)  | 6,569                | 3,157     | 3,412         | 0.14%       | 51.9%            |          |
|                             | Metabolic disorders                   | Other                     | E70-83; E86-88      | 5,027   | 2,836           | 2,191                 | 0.25%                 | 43.6% (37.1 to 49.9) | 28,757    | 18,160        | 10,598      | 0.44%            | 36.9%    |
| Amyloidosis                 | E85                                   | 1,969                     | 1,865               | 104     | 0.01%           | 5.3% (-6.9 to 16.6)   | 3,650                 | 3,335                | 316       | 0.01%         | 8.6%        |                  |          |
| Cystic fibrosis             | E84                                   | 1,556                     | 1,592               | -36     | 0.00%           | -2.3% (-19.9 to 14.6) | 12,404                | 12,698               | -294      | -0.01%        | -2.4%       |                  |          |
| Total                       | E70-88                                | 8,552                     | 6,292               | 2,260   | 0.26%           | 26.4% (20.7 to 32.0)  | 44,812                | 34,193               | 10,619    | 0.44%         | 23.7%       |                  |          |
| TOTAL                       | E00-88                                | 38,663                    | 18,567              | 20,096  | 2.29%           | 52.0% (49.9 to 54.1)  | 123,922               | 64,378               | 59,545    | 2.48%         | 48.0%       |                  |          |
| V Mental & behavioural      | Psychoactive substance use            | Opioids                   | F11                 | 3,165   | 696             | 2,469                 | 0.28%                 | 78.0% (72.0 to 83.7) | 20,202    | 5,347         | 14,856      | 0.62%            | 73.5%    |
| Other                       | F12-19                                | 2,710                     | 687                 | 2,023   | 0.23%           | 74.6% (67.7 to 81.3)  | 17,252                | 5,303                | 11,949    | 0.50%         | 69.3%       |                  |          |
| Alcohol                     | F10                                   | 7,190                     | 2,846               | 4,344   | 0.50%           | 60.4% (56.0 to 64.7)  | 27,516                | 10,825               | 16,690    | 0.70%         | 60.7%       |                  |          |
| Total                       | F10-19                                | 13,065                    | 4,229               | 8,837   | 1.01%           | 67.6% (64.5 to 70.8)  | 64,969                | 21,475               | 43,495    | 1.81%         | 66.9%       |                  |          |
| Organic                     | F01-09                                | 17,788                    | 11,133              | 6,655   | 0.76%           | 37.4% (34.1 to 40.6)  | 17,559                | 11,582               | 5,977     | 0.25%         | 34.0%       |                  |          |
| Other                       | F20-99                                | 1,100                     | 750                 | 350     | 0.04%           | 31.8% (16.3 to 46.6)  | 4,717                 | 3,311                | 1,406     | 0.06%         | 29.8%       |                  |          |
| TOTAL                       | F01-99                                | 31,953                    | 16,112              | 15,841  | 1.81%           | 49.6% (47.3 to 51.8)  | 87,245                | 36,367               | 50,878    | 2.12%         | 58.3%       |                  |          |
| VI Nervous                  | Episodic & paroxysmal                 | G40-47                    | 11,002              | 5,997   | 5,005           | 0.57%                 | 45.5% (41.0 to 49.9)  | 57,627               | 34,485    | 23,142        | 0.96%       | 40.2%            |          |
| Myoneural junction & muscle | G70-72                                | 3,689                     | 2,436               | 1,253   | 0.14%           | 34.0% (25.9 to 42.0)  | 19,148                | 12,173               | 6,975     | 0.29%         | 36.4%       |                  |          |
| Other                       | G00-09; G50-64; G90-98                | 9,050                     | 6,289               | 2,761   | 0.31%           | 30.5% (25.4 to 35.5)  | 34,939                | 23,467               | 11,472    | 0.48%         | 32.8%       |                  |          |
| Cerebral palsy & paralytic  | G80-83                                | 4,256                     | 3,068               | 1,188   | 0.14%           | 27.9% (19.8 to 35.9)  | 26,398                | 20,746               | 5,652     | 0.24%         | 21.4%       |                  |          |
| Other degenerative          | G30-31                                | 14,755                    | 12,202              | 2,553   | 0.29%           | 17.3% (13.1 to 21.4)  | 22,703                | 18,304               | 4,399     | 0.18%         | 19.4%       |                  |          |

| Chapter        | Subgroup                          | Diagnosis                     | ICD10 codes              | Deaths  | Expected deaths | Excess deaths | % of excess deaths   | MA SI (95% CI)       | YLLs      | Expected YLLs | Excess YLLs | % of excess YLLs | YLLI (%) |
|----------------|-----------------------------------|-------------------------------|--------------------------|---------|-----------------|---------------|----------------------|----------------------|-----------|---------------|-------------|------------------|----------|
|                |                                   | Demyelinating diseases of CNS | G35-37                   | 12,872  | 10,738          | 2,134         | 0.24%                | 16.6% (12.1 to 21.0) | 35,443    | 29,322        | 6,121       | 0.25%            | 17.3%    |
|                |                                   | Extrapyramidal & movement     | G20-26                   | 10,665  | 9,671           | 994           | 0.11%                | 9.3% (4.2 to 14.3)   | 11,281    | 9,837         | 1,444       | 0.06%            | 12.8%    |
|                |                                   | Systemic atrophies of CNS     | G10-14                   | 19,008  | 17,992          | 1,016         | 0.12%                | 5.3% (1.5 to 9.2)    | 47,214    | 42,751        | 4,463       | 0.19%            | 9.5%     |
|                |                                   | TOTAL                         | G00-98                   | 85,297  | 68,391          | 16,906        | 1.93%                | 19.8% (18.1 to 21.5) | 254,753   | 191,085       | 63,669      | 2.65%            | 25.0%    |
| IX Circulatory | Hypertensive                      | Renal                         | I12                      | 1,286   | 672             | 614           | 0.07%                | 47.8% (36.0 to 58.8) | 2,278     | 1,049         | 1,229       | 0.05%            | 53.9%    |
|                |                                   | Other                         | I10; I13-15              | 2,208   | 1,163           | 1,045         | 0.12%                | 47.3% (38.6 to 56.0) | 4,251     | 2,162         | 2,089       | 0.09%            | 49.1%    |
|                |                                   | Heart failure                 | I11                      | 14,467  | 7,809           | 6,658         | 0.76%                | 46.0% (42.5 to 49.4) | 32,338    | 15,510        | 16,828      | 0.70%            | 52.0%    |
|                |                                   | Total                         | I10-15                   | 17,961  | 9,644           | 8,318         | 0.95%                | 46.3% (43.2 to 49.4) | 38,867    | 18,721        | 20,146      | 0.84%            | 51.8%    |
|                | Ischaemic heart diseases          | Other                         | I20; I22-24              | 1,320   | 618             | 702           | 0.08%                | 53.2% (42.4 to 63.8) | 2,691     | 1,110         | 1,581       | 0.07%            | 58.8%    |
|                |                                   | Chronic                       | I25                      | 194,952 | 103,665         | 91,288        | 10.41%               | 46.8% (45.9 to 47.7) | 393,748   | 196,253       | 197,495     | 8.22%            | 50.2%    |
|                |                                   | Acute MI                      | I21                      | 139,254 | 79,072          | 60,182        | 6.86%                | 43.2% (42.1 to 44.4) | 290,400   | 157,190       | 133,210     | 5.55%            | 45.9%    |
|                |                                   | Total                         | I20-25                   | 335,526 | 183,355         | 152,171       | 17.35%               | 45.4% (44.6 to 46.1) | 686,839   | 354,553       | 332,286     | 13.84%           | 48.4%    |
|                | Pulmonary                         | Other                         | I27-28                   | 2,960   | 1,690           | 1,270         | 0.14%                | 42.9% (34.7 to 50.9) | 9,202     | 5,801         | 3,401       | 0.14%            | 37.0%    |
|                |                                   | Pulmonary embolism            | I26                      | 13,314  | 7,882           | 5,432         | 0.62%                | 40.8% (37.0 to 44.6) | 31,475    | 17,626        | 13,849      | 0.58%            | 44.0%    |
|                |                                   | Total                         | I26-28                   | 16,274  | 9,573           | 6,701         | 0.76%                | 41.2% (37.7 to 44.6) | 40,677    | 23,427        | 17,250      | 0.72%            | 42.4%    |
|                | Veins, lymph vessels & nodes      | Other                         | I81-89                   | 2,739   | 1,264           | 1,475         | 0.17%                | 53.9% (46.3 to 61.3) | 9,035     | 3,358         | 5,677       | 0.24%            | 62.8%    |
|                |                                   | Phlebitis & thrombo.          | I80                      | 19,324  | 11,755          | 7,569         | 0.86%                | 39.2% (35.9 to 42.3) | 48,857    | 26,012        | 22,845      | 0.95%            | 46.8%    |
|                |                                   | Total                         | I80-89                   | 22,063  | 13,019          | 9,044         | 1.03%                | 41.0% (38.0 to 43.9) | 57,892    | 29,371        | 28,522      | 1.19%            | 49.3%    |
|                | Other types of -heart disease     | Heart failure                 | I50                      | 10,577  | 5,329           | 5,248         | 0.60%                | 49.6% (45.8 to 53.4) | 16,971    | 7,677         | 9,294       | 0.39%            | 54.8%    |
|                |                                   | Cardiomyopathy                | I42                      | 14,646  | 9,085           | 5,561         | 0.63%                | 38.0% (34.2 to 41.7) | 53,071    | 32,400        | 20,672      | 0.86%            | 39.0%    |
|                |                                   | Other                         | I30-40; I44-47; I49; I51 | 29,583  | 18,506          | 11,077        | 1.26%                | 37.4% (34.7 to 40.1) | 82,759    | 52,107        | 30,652      | 1.28%            | 37.0%    |
|                |                                   | Atrial fibrillation & flutter | I48                      | 4,527   | 2,941           | 1,586         | 0.18%                | 35.0% (28.2 to 41.7) | 5,512     | 3,518         | 1,994       | 0.08%            | 36.2%    |
|                |                                   | Total                         | I30-51                   | 59,333  | 35,861          | 23,472        | 2.68%                | 39.6% (37.7 to 41.4) | 158,313   | 95,702        | 62,611      | 2.61%            | 39.5%    |
|                | Stroke                            | Other                         | I64-69                   | 49,919  | 29,527          | 20,392        | 2.32%                | 40.8% (38.9 to 42.7) | 73,290    | 39,621        | 33,669      | 1.40%            | 45.9%    |
|                |                                   | Infarction                    | I63                      | 12,750  | 7,550           | 5,200         | 0.59%                | 40.8% (36.9 to 44.6) | 26,021    | 15,049        | 10,971      | 0.46%            | 42.2%    |
|                |                                   | Haemorrhage                   | I60-62                   | 48,541  | 31,306          | 17,235        | 1.97%                | 35.5% (33.4 to 37.6) | 128,942   | 76,383        | 52,559      | 2.19%            | 40.8%    |
|                |                                   | Total                         | I60-69                   | 111,210 | 68,383          | 42,827        | 4.88%                | 38.5% (37.2 to 39.8) | 228,253   | 131,053       | 97,199      | 4.05%            | 42.6%    |
| Arteries       | Other                             | I70; I72-78                   | 9,477                    | 4,548   | 4,929           | 0.56%         | 52.0% (47.9 to 55.9) | 17,561               | 8,313     | 9,249         | 0.39%       | 52.7%            |          |
|                | Aortic aneurysm & dis.            | I71                           | 27,370                   | 19,628  | 7,743           | 0.88%         | 28.3% (25.4 to 31.1) | 45,148               | 32,420    | 12,729        | 0.53%       | 28.2%            |          |
|                | Total                             | I70-78                        | 36,847                   | 24,175  | 12,672          | 1.44%         | 34.4% (32.0 to 36.7) | 62,710               | 40,732    | 21,977        | 0.92%       | 35.0%            |          |
| Other          |                                   | I00-09; I95-99                | 4,330                    | 2,966   | 1,364           | 0.16%         | 31.5% (24.2 to 38.6) | 8,938                | 4,944     | 3,994         | 0.17%       | 44.7%            |          |
|                | TOTAL                             |                               | I00-99                   | 603,544 | 346,975         | 256,569       | 29.25%               | 42.5% (42.0 to 43.0) | 1,282,489 | 698,504       | 583,985     | 24.32%           | 45.5%    |
| X Respiratory  | Chronic lung diseases             | Other (COPD)                  | J40-44; J46-47           | 123,758 | 43,088          | 80,670        | 9.20%                | 65.2% (64.2 to 66.2) | 201,237   | 59,618        | 141,618     | 5.90%            | 70.4%    |
|                |                                   | Asthma                        | J45                      | 5,304   | 2,381           | 2,923         | 0.33%                | 55.1% (49.7 to 60.6) | 20,054    | 10,068        | 9,987       | 0.42%            | 49.8%    |
|                |                                   | Total                         | J40-47                   | 129,062 | 45,469          | 83,593        | 9.53%                | 64.8% (63.8 to 65.7) | 221,291   | 69,686        | 151,605     | 6.31%            | 68.5%    |
|                | Lung abscess, gangrene, pyothorax |                               | J85-86                   | 2,103   | 877             | 1,226         | 0.14%                | 58.3% (50.1 to 66.2) | 6,178     | 2,468         | 3,711       | 0.15%            | 60.1%    |
|                | Influenza & pneumonia             |                               | J09-18                   | 57,676  | 28,163          | 29,513        | 3.36%                | 51.2% (49.5 to 52.8) | 136,170   | 63,351        | 72,819      | 3.03%            | 53.5%    |
|                | Other lung infections             |                               | J20-22                   | 4,351   | 2,245           | 2,106         | 0.24%                | 48.4% (41.9 to 54.6) | 12,493    | 6,409         | 6,084       | 0.25%            | 48.7%    |

| Chapter                                         | Subgroup                             | Diagnosis               | ICD10 codes                    | Deaths  | Expected deaths | Excess deaths | % of excess deaths | MA SI (95% CI)       | YLLs    | Expected YLLs | Excess YLLs | % of excess YLLs | YLLI (%) |
|-------------------------------------------------|--------------------------------------|-------------------------|--------------------------------|---------|-----------------|---------------|--------------------|----------------------|---------|---------------|-------------|------------------|----------|
|                                                 | External agents                      |                         | J60-70                         | 7,912   | 4,255           | 3,658         | 0.42%              | 46.2% (41.4 to 50.8) | 17,492  | 9,503         | 7,989       | 0.33%            | 45.7%    |
|                                                 | Other                                |                         | J00-06; J32-39; J80-84; J90-98 | 29,355  | 19,096          | 10,259        | 1.17%              | 34.9% (32.3 to 37.6) | 57,451  | 33,163        | 24,289      | 1.01%            | 42.3%    |
|                                                 | TOTAL                                |                         | J00-98                         | 230,459 | 100,104         | 130,355       | 14.86%             | 56.6% (55.8 to 57.3) | 451,075 | 184,580       | 266,496     | 11.10%           | 59.1%    |
| XI Digestive                                    | Liver                                | Alcoholic liver disease | K70                            | 63,105  | 27,650          | 35,455        | 4.04%              | 56.2% (54.7 to 57.7) | 230,161 | 92,947        | 137,214     | 5.71%            | 59.6%    |
|                                                 |                                      | Other                   | K71-73; K75-76                 | 12,794  | 6,417           | 6,377         | 0.73%              | 49.8% (46.2 to 53.4) | 40,081  | 16,679        | 23,402      | 0.97%            | 58.4%    |
|                                                 |                                      | Fibrosis & cirrhosis    | K74                            | 17,606  | 9,277           | 8,330         | 0.95%              | 47.3% (44.0 to 50.4) | 50,101  | 23,014        | 27,087      | 1.13%            | 54.1%    |
|                                                 |                                      | Total                   | K70-76                         | 93,505  | 43,344          | 50,161        | 5.72%              | 53.6% (52.4 to 54.9) | 320,343 | 132,639       | 187,703     | 7.82%            | 58.6%    |
|                                                 | Oesophagus, stomach, duodenum        |                         | K20-31                         | 17,111  | 8,177           | 8,934         | 1.02%              | 52.2% (49.1 to 55.2) | 42,779  | 18,820        | 23,959      | 1.00%            | 56.0%    |
|                                                 | Hernia                               |                         | K40-46                         | 3,153   | 1,598           | 1,555         | 0.18%              | 49.3% (42.0 to 56.4) | 6,469   | 3,209         | 3,260       | 0.14%            | 50.4%    |
|                                                 | Gallbladder, biliary tract, pancreas |                         | K80-87                         | 13,877  | 7,314           | 6,564         | 0.75%              | 47.3% (43.8 to 50.8) | 34,961  | 16,610        | 18,351      | 0.76%            | 52.5%    |
|                                                 | Other                                |                         | K00-14; K35-38; K65-66; K90-92 | 6,841   | 3,608           | 3,233         | 0.37%              | 47.3% (42.2 to 52.2) | 16,135  | 8,090         | 8,046       | 0.34%            | 49.9%    |
|                                                 | Other intestines                     |                         | K55-64                         | 25,674  | 14,116          | 11,558        | 1.32%              | 45.0% (42.3 to 47.6) | 52,243  | 26,901        | 25,341      | 1.06%            | 48.5%    |
|                                                 | Noninfective enteritis & colitis     |                         | K50-52                         | 3,248   | 2,139           | 1,109         | 0.13%              | 34.1% (25.4 to 42.1) | 8,532   | 5,038         | 3,493       | 0.15%            | 40.9%    |
|                                                 | TOTAL                                |                         | K00-92                         | 163,409 | 80,296          | 83,113        | 9.48%              | 50.9% (49.9 to 51.9) | 481,461 | 211,308       | 270,153     | 11.25%           | 56.1%    |
| XII Skin & subcutaneous tissue                  | Other                                |                         | L10-98                         | 2,264   | 942             | 1,322         | 0.15%              | 58.4% (50.4 to 66.2) | 4,800   | 2,398         | 2,402       | 0.10%            | 50.0%    |
|                                                 | Infections                           |                         | L00-08                         | 3,711   | 1,909           | 1,803         | 0.21%              | 48.6% (41.6 to 55.1) | 7,948   | 3,694         | 4,254       | 0.18%            | 53.5%    |
|                                                 | TOTAL                                |                         | L00-98                         | 5,975   | 2,851           | 3,124         | 0.36%              | 52.3% (47.1 to 57.5) | 12,747  | 6,092         | 6,656       | 0.28%            | 52.2%    |
| XIII Musculoskeletal system & connective tissue | Osteopathies & chondropathies        |                         | M80-94                         | 1,991   | 1,162           | 829           | 0.09%              | 41.6% (31.9 to 51.0) | 3,422   | 1,727         | 1,694       | 0.07%            | 49.5%    |
|                                                 | Soft tissue disorders                |                         | M60-79                         | 1,690   | 995             | 695           | 0.08%              | 41.1% (30.2 to 51.4) | 4,751   | 2,877         | 1,874       | 0.08%            | 39.4%    |
|                                                 | Arthropathies                        |                         | M00-25                         | 5,239   | 3,334           | 1,905         | 0.22%              | 36.4% (30.0 to 42.5) | 8,822   | 5,106         | 3,716       | 0.15%            | 42.1%    |
|                                                 | Other                                |                         | M40-54; M95-98                 | 1,523   | 1,062           | 462           | 0.05%              | 30.3% (17.9 to 42.4) | 4,997   | 3,234         | 1,763       | 0.07%            | 35.3%    |
|                                                 | Systemic connective tissue           |                         | M30-35                         | 3,970   | 2,851           | 1,119         | 0.13%              | 28.2% (20.3 to 35.9) | 11,576  | 7,117         | 4,459       | 0.19%            | 38.5%    |
|                                                 | TOTAL                                |                         | M00-98                         | 14,413  | 9,403           | 5,010         | 0.57%              | 34.8% (30.9 to 38.5) | 33,568  | 20,062        | 13,506      | 0.56%            | 40.2%    |
| XIV Genitourinary system                        | Renal tubulo-interstitial            |                         | N10-15                         | 2,595   | 1,290           | 1,305         | 0.15%              | 50.3% (42.3 to 58.2) | 6,504   | 3,387         | 3,117       | 0.13%            | 47.9%    |
|                                                 | Other                                |                         | N20-99                         | 12,200  | 6,444           | 5,756         | 0.66%              | 47.2% (43.3 to 51.0) | 22,293  | 11,086        | 11,207      | 0.47%            | 50.3%    |
|                                                 | Renal failure                        |                         | N17-19                         | 6,240   | 3,303           | 2,937         | 0.33%              | 47.1% (41.8 to 52.3) | 12,823  | 6,568         | 6,255       | 0.26%            | 48.8%    |
|                                                 | Glomerular                           |                         | N00-07                         | 1,096   | 656             | 440           | 0.05%              | 40.2% (26.2 to 53.2) | 2,864   | 2,214         | 650         | 0.03%            | 22.7%    |
|                                                 | TOTAL                                |                         | N00-99                         | 22,131  | 11,693          | 10,438        | 1.19%              | 47.2% (44.3 to 50.0) | 44,483  | 23,254        | 21,229      | 0.88%            | 47.7%    |
| XVII Congenital                                 | Nervous system                       |                         | Q00-07                         | 1,634   | 791             | 843           | 0.10%              | 51.6% (40.4 to 62.4) | 14,329  | 7,120         | 7,209       | 0.30%            | 50.3%    |
|                                                 | Chromosomal, NEC                     |                         | Q90-99                         | 4,575   | 2,479           | 2,096         | 0.24%              | 45.8% (39.2 to 52.1) | 22,022  | 14,862        | 7,160       | 0.30%            | 32.5%    |
|                                                 | Other                                |                         | Q18; Q30-89                    | 3,709   | 2,386           | 1,323         | 0.15%              | 35.7% (27.4 to 43.6) | 27,109  | 16,643        | 10,466      | 0.44%            | 38.6%    |
|                                                 | Circulatory system                   |                         | Q20-28                         | 5,608   | 4,100           | 1,508         | 0.17%              | 26.9% (19.8 to 34.0) | 43,271  | 32,110        | 11,161      | 0.46%            | 25.8%    |
|                                                 | TOTAL                                |                         | Q00-99                         | 15,526  | 9,756           | 5,770         | 0.66%              | 37.2% (33.1 to 41.0) | 106,732 | 70,735        | 35,996      | 1.50%            | 33.7%    |
| XVIII Symptoms, signs & abnormal findings       |                                      |                         | R02-99                         | 17,305  | 6,473           | 10,832        | 1.24%              | 62.6% (59.7 to 65.4) | 99,264  | 39,477        | 59,787      | 2.49%            | 60.2%    |
| XX External                                     | Undetermined intent                  |                         | Y10-34; U50                    | 24,739  | 12,154          | 12,585        | 1.43%              | 50.9% (48.1 to 53.7) | 146,773 | 74,664        | 72,109      | 3.00%            | 49.1%    |

| Chapter   | Subgroup  | Diagnosis                 | ICD10 codes                                                                         | Deaths    | Expected deaths | Excess deaths | % of excess deaths | MASI (95% CI)        | YLLs      | Expected YLLs | Excess YLLs | % of excess YLLs | YLLI (%) |
|-----------|-----------|---------------------------|-------------------------------------------------------------------------------------|-----------|-----------------|---------------|--------------------|----------------------|-----------|---------------|-------------|------------------|----------|
|           | Accidents | Drugs & alcohol poisoning | X41-42; X44-45                                                                      | 25,928    | 9,066           | 16,862        | 1.92%              | 65.0% (62.6 to 67.5) | 144,568   | 54,816        | 89,752      | 3.74%            | 62.1%    |
|           |           | Other                     | X00-40; X43; X46-59; W00-98; V00; V07-08; V37; V45; V57; V68; V80; V83; V86; V90-97 | 36,360    | 21,723          | 14,637        | 1.67%              | 40.3% (37.8 to 42.7) | 145,441   | 86,483        | 58,959      | 2.46%            | 40.5%    |
|           |           | Vehicle accident          | V01-06; V09-34; V38-44; V46-55; V58-67; V69-79; V81-82; V84-85; V87-89              | 23,982    | 19,745          | 4,237         | 0.48%              | 17.7% (13.9 to 21.4) | 160,495   | 138,405       | 22,090      | 0.92%            | 13.8%    |
|           |           | Total                     | X00-59; V00-97; W00-98                                                              | 86,270    | 50,534          | 35,736        | 4.07%              | 41.4% (39.8 to 43.1) | 450,504   | 279,704       | 170,800     | 7.11%            | 37.9%    |
|           |           | Medical & surgical care   | Y40-84                                                                              | 4,829     | 2,881           | 1,948         | 0.22%              | 40.3% (33.8 to 46.6) | 14,101    | 8,151         | 5,950       | 0.25%            | 42.2%    |
|           |           | Other                     | X85-99; Y00-09; Y35-36; Y85-98                                                      | 2,300     | 1,419           | 881           | 0.10%              | 38.3% (27.7 to 48.5) | 12,325    | 8,045         | 4,281       | 0.18%            | 34.7%    |
|           |           | Intentional self-harm     | X60-84                                                                              | 47,931    | 35,820          | 12,111        | 1.38%              | 25.3% (22.8 to 27.7) | 248,961   | 187,001       | 61,961      | 2.58%            | 24.9%    |
|           |           | TOTAL                     | X00-99; V00-97; W00-98; Y00-98; U50                                                 | 166,069   | 102,809         | 63,260        | 7.21%              | 38.1% (36.9 to 39.3) | 872,665   | 557,564       | 315,100     | 13.12%           | 36.1%    |
|           | Neonatal  |                           | All causes age 0-27 days                                                            | 31,247    | 19,490          | 11,757        | 1.34%              | 37.6% (34.6 to 40.6) | 422,093   | 282,303       | 139,790     | 5.82%            | 33.1%    |
|           | Other     |                           | P00-96; O00-99; H05-82; Z05-ZZ; S18; T32-98; U00-49; U83-85                         | 3,709     | 2,132           | 1,577         | 0.18%              | 42.5% (34.3 to 50.3) | 42,970    | 25,624        | 17,346      | 0.72%            | 40.4%    |
| ALL-CAUSE |           |                           | 2,465,285                                                                           | 1,588,203 | 877,082         | 100.00%       | 35.6% (35.3, 35.9) | 6,638,694            | 4,237,406 | 2,401,288     | 100.00%     | 36.2%            |          |



### 3 Mortality attributable to socioeconomic inequality by major cause of death and sex

Figure S2: Mortality attributable to socioeconomic inequality by major cause of death and sex, 2003-2018

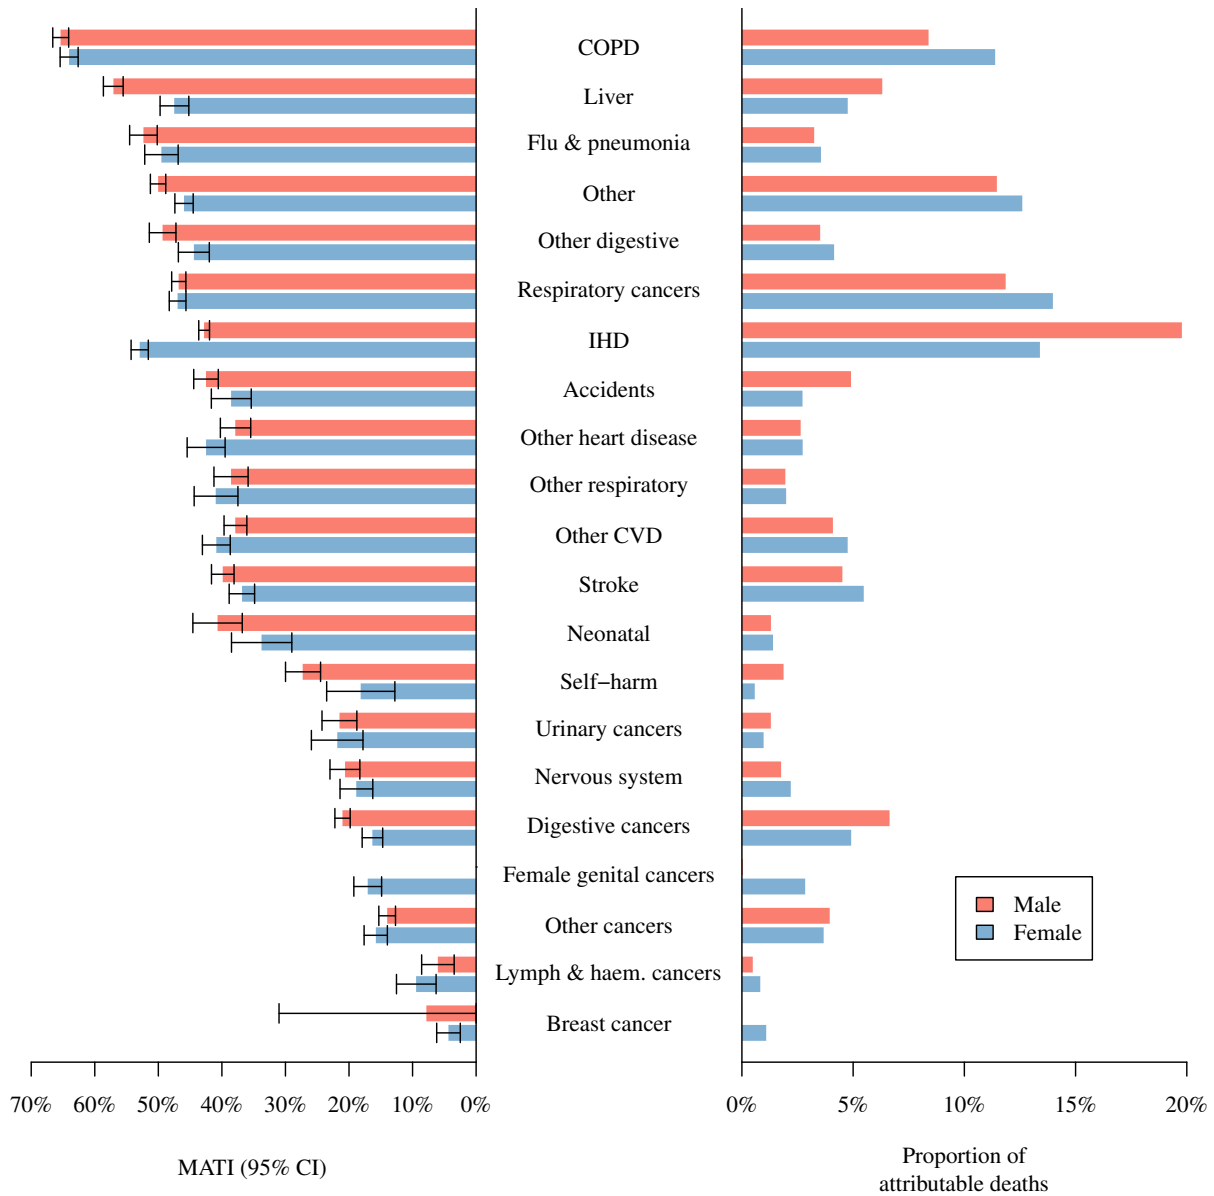

Table S2: Mortality attributable to socioeconomic inequality by major cause of death, 2003-2018: Males

| Chapter        | Major cause of death      | ICD10 codes | Deaths before age 75 |          |         |                      | Months of life lost before age 75 |          |        |          |
|----------------|---------------------------|-------------|----------------------|----------|---------|----------------------|-----------------------------------|----------|--------|----------|
|                |                           |             | Observed             | Expected | Excess  | MASI (95% CI)        | Observed                          | Expected | Excess | YLLI (%) |
| Cancers        | Breast                    | C50         | 501                  | 462      | 39      | 7.8% (-17.0%, 30.7%) | <0.1                              | <0.1     | <0.1   | -4.90%   |
|                | Digestive                 | C15-26      | 171,504              | 135,444  | 36,060  | 21.0% (19.8%, 22.2%) | 4.2                               | 3.4      | 0.8    | 19.40%   |
|                | Female genital organs     | C51-58      | -                    | -        | -       | -                    | -                                 | -        | -      | -        |
|                | Respiratory               | C30-39      | 137,610              | 73,200   | 64,410  | 46.8% (45.7%, 47.9%) | 3.1                               | 1.6      | 1.5    | 47.70%   |
|                | Lymphoid & haematopoietic | C81-96      | 44,141               | 41,482   | 2,659   | 6.0% (3.5%, 8.5%)    | 1.3                               | 1.2      | 0.1    | 2.10%    |
|                | Other                     |             | 186,176              | 157,658  | 28,518  | 15.3% (14.1%, 16.5%) | 4.9                               | 4.3      | 0.6    | 11.80%   |
| Circulatory    | Stroke                    | I60-69      | 61,553               | 37,014   | 24,539  | 39.9% (38.1%, 41.6%) | 1.5                               | 0.9      | 0.7    | 43.10%   |
|                | IHD                       | I20-25      | 251,020              | 143,578  | 107,442 | 42.8% (42.0%, 43.7%) | 6.4                               | 3.5      | 2.9    | 45.40%   |
|                | Other                     |             | 58,642               | 36,417   | 22,225  | 37.9% (36.0%, 39.7%) | 1.5                               | 0.9      | 0.6    | 42.50%   |
|                | Other heart diseases      | I30-51      | 37,871               | 23,519   | 14,352  | 37.9% (35.5%, 40.2%) | 1.3                               | 0.8      | 0.5    | 37.70%   |
| Neonatal       |                           |             | 17,434               | 10,341   | 7,093   | 40.7% (36.7%, 44.6%) | 2.8                               | 1.8      | 1.0    | 36.40%   |
| Other          |                           |             | 102,480              | 51,269   | 51,211  | 50.0% (48.7%, 51.3%) | 4.6                               | 2.3      | 2.3    | 50.60%   |
| Nervous system |                           | G00-98      | 46,401               | 36,831   | 9,570   | 20.6% (18.3%, 22.9%) | 1.7                               | 1.3      | 0.4    | 26.20%   |
| Respiratory    | COPD                      | J40-44      | 69,711               | 24,128   | 45,583  | 65.4% (64.1%, 66.7%) | 1.4                               | 0.5      | 1.0    | 68.30%   |
|                | Flu & pneumonia           | J09-18      | 33,716               | 16,069   | 17,647  | 52.3% (50.2%, 54.5%) | 1.0                               | 0.4      | 0.5    | 55.30%   |
|                | Other                     |             | 27,518               | 16,907   | 10,611  | 38.6% (35.8%, 41.2%) | 0.7                               | 0.4      | 0.3    | 44.60%   |
| Digestive      | Liver                     | K70-76      | 60,067               | 25,789   | 34,278  | 57.1% (55.5%, 58.6%) | 2.5                               | 1.0      | 1.5    | 61.00%   |
|                | Other                     |             | 38,747               | 19,631   | 19,116  | 49.3% (47.3%, 51.5%) | 1.1                               | 0.5      | 0.6    | 54.40%   |
| External       | Accidents                 | **          | 62,676               | 36,037   | 26,639  | 42.5% (40.5%, 44.5%) | 4.1                               | 2.5      | 1.6    | 38.00%   |
|                | Other                     |             | 59,258               | 38,028   | 21,230  | 35.8% (33.7%, 37.8%) | 3.8                               | 2.5      | 1.3    | 35.20%   |

Table S3: Mortality attributable to socioeconomic inequality by major cause of death, 2003-2018: Females

| Chapter        | Major cause of death      | ICD10 codes | Deaths before age 75 |          |        |                      | Months of life lost before age 75 |          |        |          |
|----------------|---------------------------|-------------|----------------------|----------|--------|----------------------|-----------------------------------|----------|--------|----------|
|                |                           |             | Observed             | Expected | Excess | MASI (95% CI)        | Observed                          | Expected | Excess | YLLI (%) |
| Cancers        | Breast                    | C50         | 83,800               | 80,151   | 3,649  | 4.4% (2.5%, 6.2%)    | 2.8                               | 2.7      | 0.1    | 2.00%    |
|                | Digestive                 | C15-26      | 100,477              | 84,075   | 16,402 | 16.3% (14.7%, 17.9%) | 2.5                               | 2.1      | 0.4    | 15.40%   |
|                | Female genital organs     | C51-58      | 55,661               | 46,166   | 9,495  | 17.1% (14.8%, 19.2%) | 1.6                               | 1.3      | 0.3    | 18.50%   |
|                | Respiratory               | C30-39      | 99,358               | 52,684   | 46,674 | 47.0% (45.7%, 48.3%) | 2.3                               | 1.2      | 1.1    | 48.60%   |
|                | Lymphoid & haematopoietic | C81-96      | 29,213               | 26,455   | 2,758  | 9.4% (6.4%, 12.5%)   | 0.8                               | 0.7      | 0.1    | 11.00%   |
|                | Other                     |             | 92,676               | 77,151   | 15,525 | 16.8% (15.0%, 18.4%) | 2.8                               | 2.5      | 0.4    | 12.60%   |
| Circulatory    | Stroke                    | I60-69      | 49,657               | 31,369   | 18,288 | 36.8% (34.8%, 38.9%) | 1.2                               | 0.7      | 0.5    | 41.90%   |
|                | IHD                       | I20-25      | 84,506               | 39,777   | 44,729 | 52.9% (51.6%, 54.2%) | 1.8                               | 0.8      | 1.1    | 59.00%   |
|                | Other                     |             | 38,833               | 22,959   | 15,874 | 40.9% (38.7%, 43.1%) | 1.0                               | 0.5      | 0.5    | 46.20%   |
|                | Other heart diseases      | I30-51      | 21,462               | 12,342   | 9,120  | 42.5% (39.4%, 45.5%) | 0.6                               | 0.4      | 0.3    | 43.10%   |
| Neonatal       |                           |             | 13,813               | 9,149    | 4,664  | 33.8% (29.1%, 38.5%) | 2.3                               | 1.6      | 0.7    | 29.20%   |
| Other          |                           |             | 81,663               | 43,942   | 37,721 | 46.2% (44.7%, 47.7%) | 3.5                               | 1.9      | 1.6    | 45.20%   |
| Nervous system |                           | G00-98      | 38,896               | 31,560   | 7,336  | 18.9% (16.3%, 21.5%) | 1.3                               | 1.0      | 0.3    | 23.40%   |
| Respiratory    | COPD                      | J40-44      | 59,351               | 21,341   | 38,010 | 64.0% (62.6%, 65.5%) | 1.2                               | 0.4      | 0.8    | 68.80%   |
|                | Flu & pneumonia           | J09-18      | 23,960               | 12,094   | 11,866 | 49.5% (46.9%, 52.2%) | 0.7                               | 0.3      | 0.3    | 50.90%   |
|                | Other                     |             | 16,203               | 9,565    | 6,638  | 41.0% (37.5%, 44.3%) | 0.4                               | 0.2      | 0.2    | 45.50%   |
| Digestive      | Liver                     | K70-76      | 33,438               | 17,555   | 15,883 | 47.5% (45.3%, 49.8%) | 1.4                               | 0.6      | 0.7    | 54.20%   |
|                | Other                     |             | 31,157               | 17,321   | 13,836 | 44.4% (41.9%, 46.8%) | 0.8                               | 0.4      | 0.4    | 46.70%   |
| External       | Accidents                 | **          | 23,594               | 14,497   | 9,097  | 38.6% (35.4%, 41.6%) | 1.3                               | 0.8      | 0.5    | 37.50%   |
|                | Other                     |             | 20,541               | 14,247   | 6,294  | 30.6% (26.9%, 34.1%) | 1.3                               | 0.9      | 0.4    | 31.20%   |

\*\* X00-59; V00-97; W00-98

## 4 Map of mortality attributable to socioeconomic inequality by local authority district

An interactive map is [available online](#), which shows the number of deaths attributable to inequality in each local authority, and the underlying causes of the attributable deaths.

Figure S3: Proportion of premature deaths attributable to social inequality (MASI) by local authority, 2003-2018

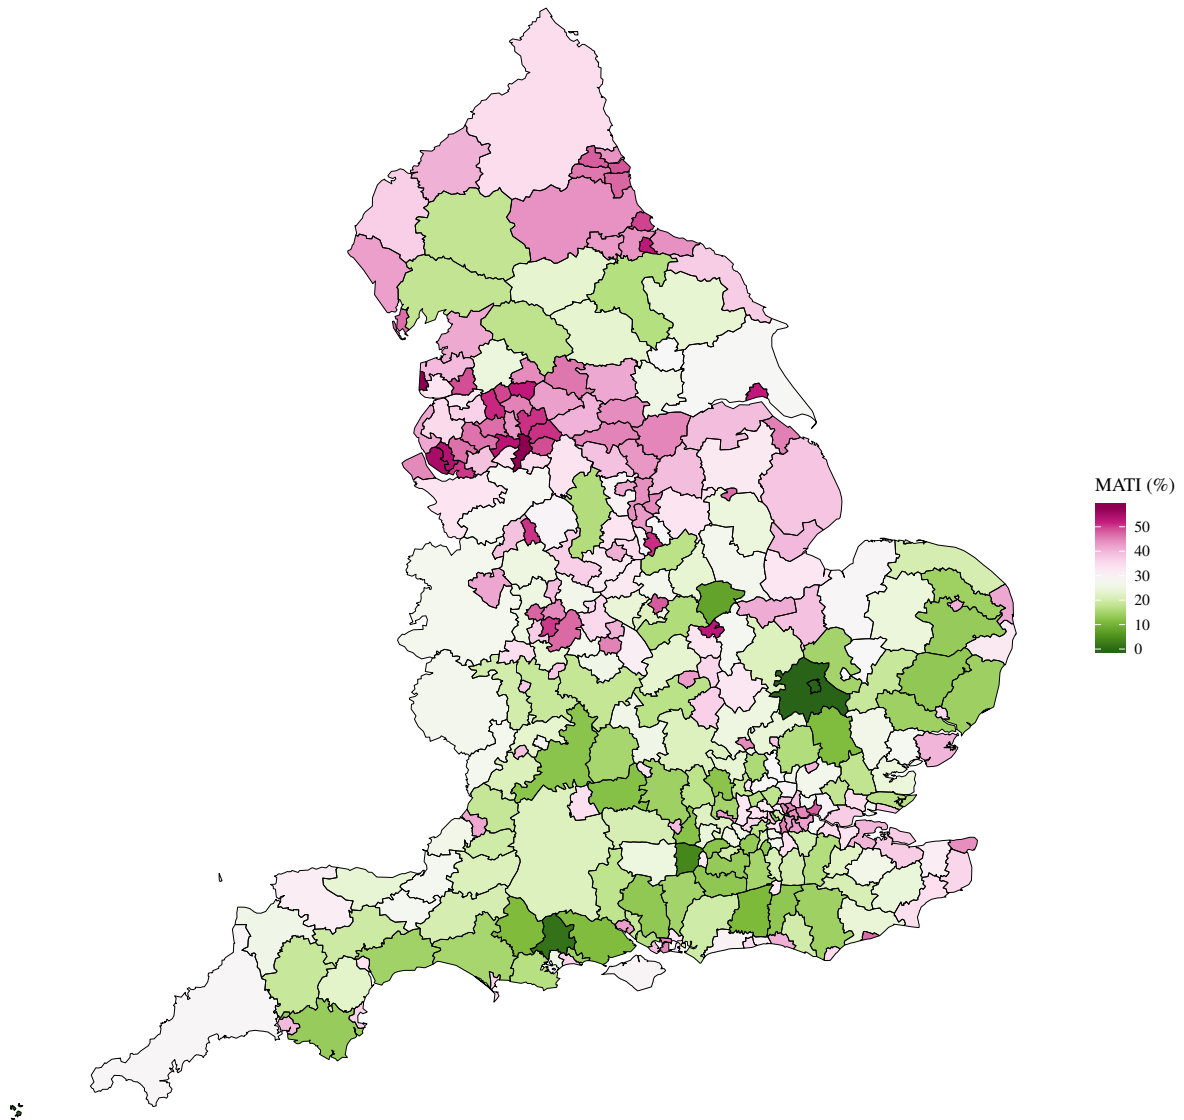

Areas shown are either district councils or unitary authorities, with a total of 326 local authority areas.

## 5 Mortality attributable to socioeconomic inequality, using different quantiles of deprivation

In our main analysis, we calculated MASI using deciles of the Index of Multiple Deprivation (IMD). Deciles were based on individuals' local neighbourhood (or Lower Super Output Area). Each neighbourhood in England is ranked from 1 (most deprived) to 32,844 (least deprived), with deciles based on these ranks. As a sensitivity analysis, we recalculated MASI using different quantiles of the ranks. For example, the row in the table below showing 2 quantiles represents an analysis where the number of expected deaths is calculated by applying mortality rates in for the less deprived half of the population to the more deprived half. For this analysis we only used data from 2003 to 2017 (i.e. excluding 2018), because we had to use a bespoke population estimate for 2018 and only created this for deciles of deprivation.

Table S4: Mortality attributable to socioeconomic inequality (MASI), recalculated using different quantile of the Index of Multiple Deprivation, 2003-2018

| Quantiles | Deaths    | Expected Deaths | Attributable deaths | MASI (95% CI)       |
|-----------|-----------|-----------------|---------------------|---------------------|
| 2         | 2,323,279 | 1,802,476       | 520,803             | 22.4% (22.3%-22.5%) |
| 3         | 2,323,279 | 1,690,740       | 632,539             | 27.2% (27.1%-27.4%) |
| 4         | 2,323,279 | 1,634,770       | 688,509             | 29.6% (29.4%-29.8%) |
| 5         | 2,323,279 | 1,597,978       | 725,301             | 31.2% (31.0%-31.4%) |
| 6         | 2,323,279 | 1,566,496       | 756,783             | 32.6% (32.3%-32.8%) |
| 7         | 2,323,279 | 1,543,442       | 779,837             | 33.6% (33.3%-33.8%) |
| 8         | 2,323,279 | 1,524,755       | 798,524             | 34.4% (34.1%-34.6%) |
| 9         | 2,323,279 | 1,510,846       | 812,433             | 35.0% (34.7%-35.3%) |
| 10        | 2,323,279 | 1,497,701       | 825,578             | 35.5% (35.2%-35.8%) |
| 11        | 2,323,279 | 1,484,571       | 838,708             | 36.1% (35.8%-36.4%) |
| 12        | 2,323,279 | 1,476,213       | 847,066             | 36.5% (36.1%-36.8%) |
| 13        | 2,323,279 | 1,470,005       | 853,274             | 36.7% (36.4%-37.1%) |
| 14        | 2,323,279 | 1,464,162       | 859,117             | 37.0% (36.6%-37.3%) |
| 15        | 2,323,279 | 1,459,394       | 863,885             | 37.2% (36.8%-37.6%) |
| 16        | 2,323,279 | 1,452,930       | 870,349             | 37.5% (37.1%-37.8%) |
| 17        | 2,323,279 | 1,448,541       | 874,738             | 37.7% (37.3%-38.0%) |
| 18        | 2,323,279 | 1,445,088       | 878,191             | 37.8% (37.4%-38.2%) |
| 19        | 2,323,279 | 1,438,089       | 885,190             | 38.1% (37.7%-38.5%) |
| 20        | 2,323,279 | 1,432,758       | 890,521             | 38.3% (37.9%-38.8%) |

## 6 Change in premature mortality rates between 2003-2006 and 2015-2018, by cause

Table S5: Premature mortality rates per 100,000 between 2003-06 and 2015-2018, adjusted to the European Standard Population 2013, by major cause of death and Index of Multiple Deprivation: Males

| Cause of death | Period                    | Index of multiple deprivation (1 = most deprived; 10 = least deprived) |       |       |       |       |       |       |       |       |       |       |
|----------------|---------------------------|------------------------------------------------------------------------|-------|-------|-------|-------|-------|-------|-------|-------|-------|-------|
|                |                           | 1                                                                      | 2     | 3     | 4     | 5     | 6     | 7     | 8     | 9     | 10    |       |
| Cancers        | Breast                    | 2003-2006                                                              | 0.2   | 0.2   | 0.1   | 0.1   | 0.2   | 0.2   | 0.2   | 0.2   | 0.3   | 0.1   |
|                |                           | 2015-2018                                                              | 0.2   | 0.2   | 0.2   | 0.1   | 0.1   | 0.2   | 0.1   | 0.1   | 0.1   | 0.2   |
|                |                           | Change                                                                 | <0.1  | <0.1  | <0.1  | <0.1  | -0.1  | <0.1  | -0.1  | <0.1  | -0.1  | 0.1   |
|                | Digestive                 | 2003-2006                                                              | 74.4  | 66.5  | 61.6  | 59.9  | 55.6  | 52.9  | 51.2  | 51.0  | 47.1  | 44.9  |
|                |                           | 2015-2018                                                              | 68.9  | 62.8  | 56.8  | 53.0  | 48.6  | 47.1  | 43.8  | 43.4  | 41.4  | 38.3  |
|                |                           | Change                                                                 | -5.6  | -3.6  | -4.8  | -6.9  | -7.0  | -5.8  | -7.4  | -7.6  | -5.7  | -6.6  |
|                | Female genital organs     | 2003-2006                                                              | -     | -     | -     | -     | -     | -     | -     | -     | -     | -     |
|                |                           | 2015-2018                                                              | -     | -     | -     | -     | -     | -     | -     | -     | -     | -     |
|                |                           | Change                                                                 | -     | -     | -     | -     | -     | -     | -     | -     | -     | -     |
|                | Respiratory               | 2003-2006                                                              | 92.8  | 77.0  | 63.7  | 53.8  | 47.0  | 42.9  | 37.7  | 35.2  | 33.0  | 27.1  |
|                |                           | 2015-2018                                                              | 73.9  | 56.6  | 48.7  | 39.8  | 34.4  | 30.4  | 26.9  | 25.7  | 22.1  | 18.6  |
|                |                           | Change                                                                 | -18.9 | -20.4 | -14.9 | -14.0 | -12.6 | -12.5 | -10.8 | -9.5  | -10.8 | -8.5  |
|                | Lymphoid & haematopoietic | 2003-2006                                                              | 17.1  | 16.1  | 15.0  | 15.8  | 15.5  | 15.2  | 14.9  | 14.3  | 15.6  | 14.7  |
|                |                           | 2015-2018                                                              | 13.9  | 12.9  | 12.7  | 12.4  | 11.5  | 11.5  | 11.5  | 10.9  | 10.0  | 10.1  |
|                |                           | Change                                                                 | -3.2  | -3.2  | -2.3  | -3.3  | -3.9  | -3.6  | -3.4  | -3.4  | -5.6  | -4.5  |
|                | Other                     | 2003-2006                                                              | 77.8  | 74.4  | 68.3  | 66.1  | 63.8  | 61.6  | 61.8  | 57.9  | 57.6  | 54.9  |
|                |                           | 2015-2018                                                              | 67.1  | 59.3  | 56.6  | 51.9  | 52.3  | 48.0  | 47.9  | 45.2  | 44.9  | 41.3  |
|                |                           | Change                                                                 | -10.7 | -15.1 | -11.7 | -14.2 | -11.6 | -13.6 | -13.9 | -12.7 | -12.7 | -13.6 |
| Circulatory    | Stroke                    | 2003-2006                                                              | 45.8  | 39.8  | 33.5  | 28.2  | 25.1  | 24.4  | 21.7  | 20.4  | 19.9  | 17.2  |
|                |                           | 2015-2018                                                              | 26.4  | 21.2  | 19.8  | 15.8  | 14.0  | 12.8  | 11.3  | 10.5  | 10.0  | 8.1   |
|                |                           | Change                                                                 | -19.4 | -18.5 | -13.7 | -12.4 | -11.0 | -11.6 | -10.4 | -9.8  | -9.9  | -9.1  |
|                | Ishaemic heart disease    | 2003-2006                                                              | 191.7 | 156.7 | 136.2 | 117.8 | 104.3 | 93.9  | 85.4  | 81.2  | 74.4  | 64.3  |
|                |                           | 2015-2018                                                              | 116.7 | 91.8  | 77.7  | 65.3  | 56.8  | 49.8  | 45.0  | 40.7  | 37.5  | 31.7  |
|                |                           | Change                                                                 | -75.0 | -64.9 | -58.5 | -52.5 | -47.6 | -44.1 | -40.4 | -40.5 | -36.9 | -32.5 |
|                | Other heart disease       | 2003-2006                                                              | 20.2  | 17.1  | 16.0  | 14.7  | 12.4  | 11.7  | 10.8  | 10.0  | 8.9   | 8.1   |
|                |                           | 2015-2018                                                              | 18.8  | 14.5  | 13.4  | 11.6  | 10.2  | 9.5   | 8.5   | 7.6   | 7.1   | 6.5   |
|                |                           | Change                                                                 | -1.3  | -2.6  | -2.6  | -3.1  | -2.2  | -2.2  | -2.4  | -2.5  | -1.8  | -1.6  |
|                | Other                     | 2003-2006                                                              | 36.3  | 31.8  | 27.4  | 25.6  | 22.8  | 20.4  | 19.1  | 17.4  | 16.6  | 14.4  |
|                |                           | 2015-2018                                                              | 26.9  | 23.3  | 20.0  | 17.0  | 14.3  | 12.9  | 11.3  | 11.2  | 10.5  | 9.0   |
|                |                           | Change                                                                 | -9.4  | -8.5  | -7.4  | -8.6  | -8.5  | -7.5  | -7.7  | -6.2  | -6.1  | -5.5  |
| Nervous system | 2003-2006                 | 17.6                                                                   | 15.8  | 15.2  | 14.5  | 13.4  | 13.3  | 13.3  | 12.6  | 12.4  | 10.8  |       |
|                | 2015-2018                 | 17.6                                                                   | 16.2  | 15.1  | 14.2  | 14.3  | 13.4  | 13.4  | 13.4  | 12.3  | 11.4  |       |
|                | Change                    | <0.1                                                                   | 0.5   | -0.2  | -0.3  | 0.9   | 0.2   | 0.1   | 0.9   | -0.1  | 0.6   |       |
| Respiratory    | COPD                      | 2003-2006                                                              | 53.3  | 44.3  | 33.6  | 26.0  | 23.1  | 18.9  | 16.0  | 14.0  | 12.1  | 8.5   |
|                |                           | 2015-2018                                                              | 56.3  | 41.6  | 32.9  | 24.6  | 20.7  | 17.1  | 13.6  | 11.8  | 10.2  | 7.3   |
|                |                           | Change                                                                 | 2.9   | -2.8  | -0.7  | -1.4  | -2.4  | -1.8  | -2.4  | -2.2  | -1.9  | -1.1  |
|                | Flu & pneumonia           | 2003-2006                                                              | 24.9  | 19.6  | 16.6  | 12.7  | 10.7  | 10.1  | 8.3   | 7.7   | 6.8   | 6.0   |
|                |                           | 2015-2018                                                              | 22.1  | 16.3  | 13.9  | 12.0  | 9.6   | 8.2   | 7.5   | 6.8   | 6.5   | 4.8   |
|                |                           | Change                                                                 | -2.9  | -3.3  | -2.8  | -0.7  | -1.1  | -1.9  | -0.8  | -1.0  | -0.4  | -1.2  |
|                | Other                     | 2003-2006                                                              | 14.8  | 12.4  | 11.8  | 9.6   | 9.1   | 8.9   | 7.6   | 7.8   | 7.1   | 5.6   |
|                |                           | 2015-2018                                                              | 12.4  | 10.3  | 9.3   | 7.6   | 7.1   | 6.2   | 5.7   | 5.8   | 5.6   | 4.3   |
|                |                           | Change                                                                 | -2.4  | -2.1  | -2.5  | -2.0  | -2.0  | -2.6  | -1.9  | -2.0  | -1.6  | -1.2  |
| Digestive      | Liver                     | 2003-2006                                                              | 42.2  | 30.6  | 25.4  | 18.3  | 15.1  | 13.3  | 11.4  | 9.6   | 9.4   | 7.5   |
|                |                           | 2015-2018                                                              | 37.1  | 26.7  | 22.0  | 17.6  | 15.8  | 13.3  | 11.4  | 10.9  | 9.2   | 7.7   |
|                |                           | Change                                                                 | -5.1  | -3.9  | -3.4  | -0.7  | 0.7   | 0.1   | -0.1  | 1.4   | -0.1  | 0.2   |
| Other          | 2003-2006                 | 26.6                                                                   | 21.9  | 18.4  | 14.8  | 12.1  | 11.7  | 9.8   | 9.8   | 8.9   | 7.1   |       |
|                | 2015-2018                 | 21.8                                                                   | 16.4  | 14.2  | 11.1  | 9.6   | 9.0   | 7.8   | 7.3   | 5.9   | 5.3   |       |
|                | Change                    | -4.8                                                                   | -5.5  | -4.2  | -3.7  | -2.6  | -2.7  | -2.0  | -2.5  | -2.9  | -1.8  |       |
| External       | Accidents                 | 2003-2006                                                              | 29.2  | 23.4  | 20.7  | 19.0  | 17.6  | 17.0  | 15.4  | 14.4  | 13.7  | 11.7  |
|                |                           | 2015-2018                                                              | 33.3  | 23.9  | 19.2  | 16.9  | 14.7  | 13.4  | 12.1  | 10.4  | 9.7   | 8.3   |
|                |                           | Change                                                                 | 4.2   | 0.5   | -1.5  | -2.1  | -2.9  | -3.6  | -3.3  | -4.1  | -4.1  | -3.4  |
|                | Other                     | 2003-2006                                                              | 28.8  | 22.7  | 19.4  | 18.1  | 16.3  | 14.1  | 11.9  | 11.3  | 10.5  | 9.9   |
|                |                           | 2015-2018                                                              | 21.8  | 18.1  | 16.6  | 15.2  | 14.2  | 13.5  | 12.7  | 11.3  | 11.1  | 9.9   |
|                |                           | Change                                                                 | -7.0  | -4.7  | -2.9  | -2.9  | -2.1  | -0.6  | 0.8   | 0.0   | 0.6   | 0.0   |
| Neonatal       | 2003-2006                 | 7.0                                                                    | 6.0   | 5.2   | 4.5   | 3.9   | 3.9   | 3.6   | 3.0   | 2.9   | 2.4   |       |
|                | 2015-2018                 | 4.4                                                                    | 3.6   | 3.0   | 3.1   | 2.7   | 2.5   | 2.2   | 2.4   | 2.4   | 1.9   |       |
|                | Change                    | -2.6                                                                   | -2.5  | -2.1  | -1.4  | -1.2  | -1.4  | -1.4  | -0.6  | -0.6  | -0.5  |       |
| Other          | 2003-2006                 | 64.4                                                                   | 51.4  | 42.0  | 36.5  | 30.6  | 26.1  | 24.0  | 22.6  | 20.8  | 16.1  |       |
|                | 2015-2018                 | 54.4                                                                   | 45.2  | 38.3  | 30.6  | 26.9  | 23.7  | 20.1  | 19.3  | 17.0  | 14.3  |       |
|                | Change                    | -10.0                                                                  | -6.2  | -3.7  | -5.8  | -3.6  | -2.4  | -3.8  | -3.4  | -3.8  | -1.8  |       |

Table S6: Premature mortality rates per 100,000 between 2003-06 and 2015-2018, adjusted to the European Standard Population 2013, by major cause of death and Index of Multiple Deprivation: Females

| Chapter        | Subgroup                  | Period    | Index of multiple deprivation (1 = most deprived; 10 = least deprived) |       |       |       |       |       |       |       |       |       |
|----------------|---------------------------|-----------|------------------------------------------------------------------------|-------|-------|-------|-------|-------|-------|-------|-------|-------|
|                |                           |           | 1                                                                      | 2     | 3     | 4     | 5     | 6     | 7     | 8     | 9     | 10    |
| Cancers        | Breast                    | 2003-2006 | 27.1                                                                   | 27.3  | 28.2  | 27.4  | 27.3  | 27.6  | 27.1  | 27.4  | 27.7  | 26.7  |
|                |                           | 2015-2018 | 22.0                                                                   | 20.8  | 19.3  | 21.4  | 20.6  | 19.5  | 19.6  | 19.8  | 19.5  | 18.5  |
|                |                           | Change    | -5.1                                                                   | -6.5  | -8.9  | -6.0  | -6.7  | -8.2  | -7.5  | -7.5  | -8.2  | -8.2  |
|                | Digestive                 | 2003-2006 | 37.1                                                                   | 34.0  | 33.5  | 31.1  | 29.5  | 29.0  | 28.6  | 27.3  | 26.6  | 25.1  |
|                |                           | 2015-2018 | 37.9                                                                   | 33.5  | 30.9  | 29.4  | 27.7  | 26.7  | 24.9  | 24.4  | 24.1  | 23.2  |
|                |                           | Change    | 0.8                                                                    | -0.5  | -2.7  | -1.7  | -1.8  | -2.2  | -3.7  | -2.9  | -2.5  | -1.9  |
|                | Female genital organs     | 2003-2006 | 20.3                                                                   | 20.1  | 18.5  | 18.6  | 16.8  | 17.1  | 17.0  | 16.4  | 16.8  | 15.2  |
|                |                           | 2015-2018 | 17.8                                                                   | 16.5  | 16.3  | 15.2  | 14.0  | 13.7  | 13.0  | 13.5  | 12.2  | 11.3  |
|                |                           | Change    | -2.5                                                                   | -3.6  | -2.2  | -3.4  | -2.8  | -3.4  | -4.0  | -2.9  | -4.6  | -3.9  |
|                | Respiratory               | 2003-2006 | 58.2                                                                   | 44.2  | 36.9  | 31.9  | 26.4  | 24.1  | 22.6  | 20.9  | 17.8  | 15.8  |
|                |                           | 2015-2018 | 56.5                                                                   | 43.3  | 36.8  | 29.6  | 26.2  | 23.3  | 21.1  | 19.0  | 17.5  | 14.1  |
|                |                           | Change    | -1.7                                                                   | -0.9  | -0.1  | -2.3  | -0.2  | -0.9  | -1.5  | -1.8  | -0.3  | -1.7  |
|                | Lymphoid & haematopoietic | 2003-2006 | 10.3                                                                   | 10.4  | 10.3  | 10.0  | 9.6   | 9.3   | 9.3   | 9.0   | 9.2   | 9.0   |
|                |                           | 2015-2018 | 8.1                                                                    | 8.7   | 7.8   | 7.1   | 7.0   | 6.7   | 6.4   | 6.7   | 6.7   | 6.4   |
|                |                           | Change    | -2.1                                                                   | -1.7  | -2.4  | -2.9  | -2.6  | -2.6  | -2.9  | -2.4  | -2.6  | -2.6  |
|                | Other                     | 2003-2006 | 37.3                                                                   | 34.8  | 33.1  | 30.5  | 29.8  | 28.7  | 28.2  | 26.6  | 26.7  | 24.8  |
|                |                           | 2015-2018 | 30.9                                                                   | 28.3  | 25.5  | 24.2  | 23.3  | 22.6  | 21.5  | 20.6  | 19.9  | 18.7  |
|                |                           | Change    | -6.4                                                                   | -6.5  | -7.6  | -6.2  | -6.4  | -6.0  | -6.7  | -6.1  | -6.8  | -6.1  |
| Circulatory    | Stroke                    | 2003-2006 | 32.6                                                                   | 26.6  | 24.2  | 23.2  | 19.8  | 18.5  | 16.7  | 16.1  | 14.9  | 13.3  |
|                |                           | 2015-2018 | 19.6                                                                   | 15.9  | 14.1  | 12.4  | 10.8  | 9.3   | 8.9   | 8.7   | 8.0   | 6.6   |
|                |                           | Change    | -13.0                                                                  | -10.7 | -10.1 | -10.8 | -9.0  | -9.2  | -7.8  | -7.4  | -6.8  | -6.6  |
|                | Ishaemic heart disease    | 2003-2006 | 72.5                                                                   | 56.4  | 48.1  | 40.5  | 33.6  | 31.3  | 27.5  | 25.6  | 22.7  | 17.9  |
|                |                           | 2015-2018 | 40.6                                                                   | 29.8  | 26.0  | 20.5  | 16.7  | 14.7  | 12.5  | 11.9  | 9.8   | 7.6   |
|                |                           | Change    | -32.0                                                                  | -26.6 | -22.1 | -20.0 | -16.9 | -16.6 | -14.9 | -13.7 | -12.9 | -10.2 |
|                | Other heart disease       | 2003-2006 | 12.2                                                                   | 10.3  | 8.7   | 8.2   | 7.2   | 6.3   | 5.9   | 5.7   | 5.0   | 4.2   |
|                |                           | 2015-2018 | 10.1                                                                   | 8.7   | 7.0   | 6.5   | 5.7   | 5.0   | 4.7   | 4.1   | 3.7   | 3.3   |
|                |                           | Change    | -2.1                                                                   | -1.6  | -1.7  | -1.6  | -1.5  | -1.3  | -1.2  | -1.6  | -1.3  | -0.9  |
|                | Other                     | 2003-2006 | 22.6                                                                   | 20.3  | 17.3  | 15.4  | 13.7  | 12.0  | 11.6  | 11.0  | 9.8   | 8.8   |
|                |                           | 2015-2018 | 17.0                                                                   | 14.2  | 12.4  | 10.5  | 9.3   | 8.5   | 7.7   | 6.8   | 6.2   | 5.2   |
|                |                           | Change    | -5.6                                                                   | -6.1  | -4.9  | -4.9  | -4.4  | -3.5  | -3.9  | -4.2  | -3.6  | -3.6  |
| Nervous system | 2003-2006                 | 11.7      | 11.3                                                                   | 10.3  | 10.8  | 10.9  | 11.1  | 10.4  | 9.9   | 9.7   | 8.9   |       |
|                | 2015-2018                 | 13.4      | 12.4                                                                   | 12.6  | 11.9  | 12.1  | 11.6  | 11.0  | 10.9  | 10.2  | 9.0   |       |
|                | Change                    | 1.7       | 1.1                                                                    | 2.3   | 1.2   | 1.3   | 0.6   | 0.6   | 1.0   | 0.4   | 0.1   |       |
| Respiratory    | COPD                      | 2003-2006 | 40.3                                                                   | 31.0  | 25.2  | 19.2  | 16.2  | 14.3  | 12.5  | 10.9  | 9.2   | 6.8   |
|                |                           | 2015-2018 | 49.2                                                                   | 34.1  | 25.7  | 21.1  | 16.3  | 13.6  | 11.4  | 10.0  | 8.3   | 5.6   |
|                |                           | Change    | 8.8                                                                    | 3.1   | 0.5   | 1.9   | 0.1   | -0.6  | -1.1  | -0.9  | -0.9  | -1.3  |
|                | Flu & pneumonia           | 2003-2006 | 14.2                                                                   | 12.5  | 10.4  | 9.0   | 7.8   | 6.8   | 6.0   | 5.3   | 4.7   | 4.3   |
|                |                           | 2015-2018 | 14.4                                                                   | 10.8  | 9.4   | 7.7   | 6.7   | 6.0   | 5.3   | 4.8   | 4.4   | 3.4   |
|                |                           | Change    | 0.2                                                                    | -1.7  | -1.0  | -1.3  | -1.1  | -0.8  | -0.7  | -0.4  | -0.3  | -1.0  |
|                | Other                     | 2003-2006 | 8.5                                                                    | 8.0   | 6.1   | 5.5   | 4.8   | 4.7   | 3.9   | 4.1   | 3.9   | 3.0   |
|                |                           | 2015-2018 | 7.0                                                                    | 5.6   | 4.8   | 4.2   | 4.1   | 3.3   | 3.0   | 3.0   | 2.8   | 2.2   |
|                |                           | Change    | -1.5                                                                   | -2.3  | -1.3  | -1.3  | -0.8  | -1.4  | -0.9  | -1.1  | -1.1  | -0.9  |
| Digestive      | Liver                     | 2003-2006 | 19.4                                                                   | 14.0  | 11.4  | 9.8   | 8.9   | 7.5   | 6.8   | 6.4   | 5.5   | 4.8   |
|                |                           | 2015-2018 | 19.1                                                                   | 14.3  | 11.2  | 10.1  | 8.8   | 7.7   | 7.0   | 6.3   | 5.6   | 5.1   |
|                |                           | Change    | -0.3                                                                   | 0.3   | -0.1  | 0.3   | -0.1  | 0.2   | 0.2   | -0.1  | 0.1   | 0.3   |
|                | Other                     | 2003-2006 | 18.5                                                                   | 15.4  | 13.5  | 11.9  | 9.8   | 9.1   | 8.6   | 8.3   | 7.6   | 6.4   |
|                |                           | 2015-2018 | 15.1                                                                   | 12.1  | 10.5  | 8.3   | 7.4   | 6.6   | 5.7   | 5.6   | 4.9   | 4.2   |
|                |                           | Change    | -3.4                                                                   | -3.3  | -3.0  | -3.6  | -2.5  | -2.5  | -3.0  | -2.7  | -2.8  | -2.2  |
| External       | Accidents                 | 2003-2006 | 10.5                                                                   | 7.6   | 7.7   | 7.0   | 7.2   | 6.0   | 5.6   | 5.4   | 5.0   | 4.6   |
|                |                           | 2015-2018 | 13.2                                                                   | 8.9   | 7.3   | 6.2   | 6.3   | 5.2   | 4.5   | 4.3   | 3.7   | 3.4   |
|                |                           | Change    | 2.7                                                                    | 1.3   | -0.4  | -0.8  | -1.0  | -0.7  | -1.1  | -1.1  | -1.4  | -1.2  |
|                | Other                     | 2003-2006 | 9.0                                                                    | 7.3   | 7.0   | 5.7   | 5.9   | 5.2   | 4.8   | 4.6   | 4.2   | 3.9   |
|                |                           | 2015-2018 | 7.7                                                                    | 6.2   | 6.2   | 5.8   | 5.4   | 4.5   | 4.6   | 4.4   | 4.2   | 3.5   |
|                |                           | Change    | -1.3                                                                   | -1.1  | -0.8  | 0.1   | -0.5  | -0.7  | -0.2  | -0.2  | 0.0   | -0.4  |
| Neonatal       | 2003-2006                 | 5.7       | 4.9                                                                    | 4.2   | 3.8   | 3.5   | 3.1   | 2.9   | 3.0   | 2.2   | 2.2   |       |
|                | 2015-2018                 | 3.4       | 3.0                                                                    | 2.7   | 2.6   | 2.2   | 2.4   | 1.7   | 1.8   | 2.0   | 1.7   |       |
|                | Change                    | -2.3      | -1.9                                                                   | -1.4  | -1.2  | -1.4  | -0.7  | -1.1  | -1.2  | -0.2  | -0.5  |       |
| Other          | 2003-2006                 | 43.3      | 36.1                                                                   | 32.0  | 27.5  | 23.0  | 21.7  | 18.9  | 18.2  | 16.9  | 14.4  |       |
|                | 2015-2018                 | 40.3      | 33.6                                                                   | 29.5  | 24.2  | 21.8  | 18.9  | 16.8  | 15.6  | 13.4  | 11.1  |       |
|                | Change                    | -3.0      | -2.4                                                                   | -2.5  | -3.3  | -1.3  | -2.7  | -2.0  | -2.7  | -3.5  | -3.4  |       |

Standardisation was based on the European Standard population 2013 [2]

## 7 Survival curves by sex and deprivation, estimated by life table modelling

We used mortality rates for entire study period (2003-2018) by single-year-of-age, sex, and deciles of Index of Multiple Deprivation to construct 20 life tables (2 sexes \* 10 deciles of deprivation) for cohorts of 100,000. The charts below show the proportion of each cohort that survived at each of age. For men, the proportion surviving to age 75 was 54% for the most deprived decile and 80% for the least deprived decile. For women, the proportions were 69% for the most deprived decile and 86% for the least deprived decile.

Figure S4: Survival curves by sex and deprivation to age 75, England, 2003-2018

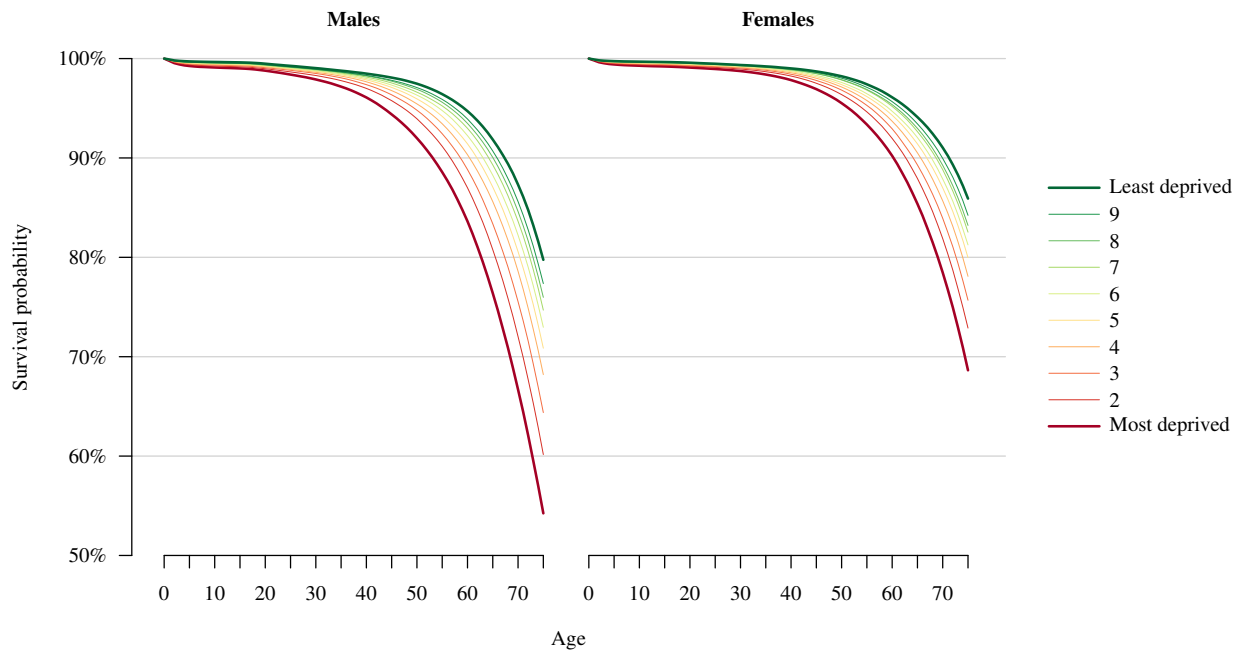

## 8 References for supplementary information

1. Office for National Statistics. Lower Super Output Area Mid-Year Population Estimates (supporting information). 2017. <https://www.ons.gov.uk/peoplepopulationandcommunity/populationandmigration/populationestimates/datasets/lowersuperoutputareamidyearpopulationestimates>
2. Pace M, Cayotte E, Agafitei L, et al. Revision of the European Standard Population: report of Eurostat's task force: 2013 edition. 2013. <https://publications.europa.eu/en/publication-detail/-/publication/69399636-1113-4a38-9ad1-269c33d0dc01/language-en/format-PDF/source-79847120> (accessed Nov 13, 2018)
